# Supplementary material for: Methanol Extract of Aerial Parts of Pavetta indica L. Enhances the Cytotoxic Effect of Doxorubicin and Induces Radiation Sensitization in MDA-MB-231 Triple-Negative Breast Cancer Cells
Source: PubMed Central journal article supplement (PMC6631732; doi:10.3390/molecules24122273), 2019-06-18
Supplement: molecules-24-02273-s001.pdf [file molecules-24-02273-s001.pdf]

Article

# Methanol Extract of Aerial Parts of *Pavetta indica* L. Enhances the Cytotoxic Effect of Doxorubicin and Induces Radiation Sensitization in MDA-MB-231 Triple-Negative Breast Cancer Cells

Yen Thi-Kim Nguyen <sup>1,†</sup>, Jeong Yong Moon <sup>2,†</sup>, Ji-yeon Ryu <sup>3</sup>, Sangmi Eum <sup>4</sup>, Tran The Bach <sup>5</sup> and Somi Kim Cho <sup>1,2,3,\*</sup>

<sup>1</sup> Interdisciplinary Graduate Program in Advanced Convergence Technology and Science, Jeju National University, Jeju 63243, Korea; ntkyen.hcmus@gmail.com

<sup>2</sup> Subtropical/tropical organism gene bank, Jeju National University, Jeju 63243, Korea; owenmjy@jejunu.ac.kr

<sup>3</sup> School of Biomaterials Sciences and Technology, College of Applied Life Sciences, SARI, Jeju National University, Jeju 63243, Korea; rjo211@naver.com

<sup>4</sup> International Biological Material Research Center, Korea Research Institute of Bioscience & Biotechnology, 125, Gwahak-ro, Yuseong-gu, Daejeon 34141, Korea; sangeum@gmail.com

<sup>5</sup> Institute of Ecology and Biological Resources, Vietnam Academy of Science and Technology (VAST), Ha Noi 10000, Vietnam; tranthebach.botany@gmail.com

\* Correspondence: somikim@jejunu.ac.kr; Tel.: +82-010-8660-1842

† These authors contributed equally to this work

**Table S1. Chemical profile of *Pavetta Indica* methanol extract using GC-MS derivatization.**

| Peak No. | RT (min) | Compound name                                                                      | % Total |
|----------|----------|------------------------------------------------------------------------------------|---------|
| 1        | 6.467    | Propanoic acid, 2-oxo-, trimethylsilyl ester                                       | 0.64    |
| 2        | 9.655    | L-Alanine, trimethylsilyl ester                                                    | 1.43    |
| 3        | 10.382   | Glycerol, tris(trimethylsilyl) ether                                               | 1.63    |
| 4        | 16.091   | .beta.-Alanine, N,N-bis(trimethylsilyl)-, trimethylsilyl ester                     | 0.67    |
| 5        | 16.42    | 3,4-Bis(trimethylsilyloxy)butyric acid trimethylsilyl ester                        | 0.33    |
| 6        | 19.411   | Erythritol, tri-TMS                                                                | 1.93    |
| 7        | 19.69    | 2-Pyrrolidone-5-carboxylic acid, trimethylsilyl ester                              | 0.15    |
| 8        | 20.086   | tert-Butyl(dimethyl)silyl 4-([tert-butyl(dimethyl)silyl]amino)butanoate            | 0.32    |
| 9        | 20.757   | 2,3,4-trihydroxybutyric acid tetrakis(trimethylsilyl) deriv. ( ( r* r* )-)         | 0.14    |
| 10       | 22.118   | L-Proline, trimethylsilyl ester                                                    | 0.41    |
| 11       | 23.858   | ARABINO-1,5-LACTONE                                                                | 0.13    |
| 12       | 27.512   | Adonitol, pentakis(trimethylsilyl) ether                                           | 0.65    |
| 13       | 28.192   | D-GLUCITOL, 1,2,3,4,5,6-HEXAKIS-O-(TRIMETHYLSILYL)-                                | 0.59    |
| 14       | 29.064   | D-Glucitol, 6-deoxy-1,2,3,4,5-pentakis-O-(trimethylsilyl)-                         | 0.23    |
| 15       | 31.126   | Shikimic acid tetrakis, trimethylsilyl ester                                       | 7.09    |
| 16       | 31.22    | Citric acid, tetrakis-TMS                                                          | 0.13    |
| 17       | 32.931   | Quinic acid, trimethylsilyl ester                                                  | 9.55    |
| 18       | 33.648   | D-Fructose, 1,3,4,5,6-pentakis-O-(trimethylsilyl)-, O-methyloxime(TRIMETHYLSILYL)- | 13.25   |
| 19       | 34.148   | D-Fructose, 1,3,4,5,6-pentakis-O-(trimethylsilyl)-, O-methyloxime(TRIMETHYLSILYL)- | 10.64   |
| 20       | 34.275   | Galactose, trimethylsilyl ester                                                    | 0.23    |
| 21       | 34.448   | Galactose, trimethylsilyl ester                                                    | 0.75    |
| 22       | 34.879   | Mannose, MEOX-5TMS                                                                 | 14.69   |

|    |        |                                                           |      |
|----|--------|-----------------------------------------------------------|------|
| 23 | 35.526 | GALACTOSE MEOX2 TMS                                       | 0.22 |
| 24 | 35.733 | GALACTOSE MEOX1 TMS                                       | 2.29 |
| 25 | 36.561 | D-Mannitol, TMS                                           | 2.69 |
| 26 | 36.915 | D-GLUCITOL, 1,2,3,4,5,6-HEXAKIS-O-(TRIMETHYLSILYL)-       | 0.15 |
| 27 | 43.985 | Palmitic Acid, TMS derivative                             | 1.35 |
| 28 | 45.994 | INOSITOL,O,O,O,O,O-TMS                                    | 6.69 |
| 29 | 46.6   | RIBITOL-1,2,3,4,5-PENTATMS                                | 0.16 |
| 30 | 47.206 | GALACTOSE MEOX1 TMS                                       | 0.21 |
| 31 | 47.756 | D-GLUCITOL, 1,2,3,4,5,6-HEXAKIS-O-(TRIMETHYLSILYL)-       | 0.15 |
| 32 | 51.463 | Linoleic acid trimethylsilyl ester                        | 0.46 |
| 33 | 51.763 | trans-9-Octadecenoic acid, trimethylsilyl ester           | 1.29 |
| 34 | 52.908 | Stearic acid, trimethylsilyl ester                        | 0.54 |
| 35 | 56.834 | D-GLUCITOL, 1,2,3,4,5,6-HEXAKIS-O-(TRIMETHYLSILYL)-       | 0.61 |
| 36 | 57.467 | GLUCOHEPTULOSE MEOX1 TMS                                  | 0.94 |
| 37 | 57.785 | Adonitol, pentakis(trimethylsilyl) ether                  | 1.08 |
| 38 | 65.325 | SUCROSE-OCTATMS                                           | 8.46 |
| 39 | 66.598 | MALTOSE MEOX2 TMS                                         | 0.83 |
| 40 | 67.332 | 6,7-DIHYDROXYCOUMARIN-.BETA.-D-GLUCOPYRANOSIDE, PENTA-TMS | 0.67 |
| 41 | 67.75  | MALTOSE-OCTATMS                                           | 0.45 |
| 42 | 67.989 | TREHALOSE TMS                                             | 0.75 |
| 43 | 68.136 | MALTOSE MEOX2 TMS                                         | 0.39 |
| 44 | 69.221 | MALTOSE MEOX2 TMS                                         | 0.78 |
| 45 | 70.225 | MALTOSE MEOX2 TMS                                         | 0.19 |
| 46 | 70.5   | Nonadecanoic acid, trimethylsilyl ester                   | 0.44 |
| 47 | 71.149 | MALTOSE MEOX2 TMS                                         | 0.74 |
| 48 | 73.817 | Galactose, trimethylsilyl ether                           | 0.44 |
| 49 | 79.438 | METHYL 18-HYDROXYOCTADEC-9,12-DIENOATE TMS ETHER          | 0.47 |
| 50 | 79.981 | Stigmasterol, trimethylsilyl ether                        | 0.42 |
| 51 | 81.242 | Campesterol, trimethylsilyl ether                         | 0.56 |

(1)

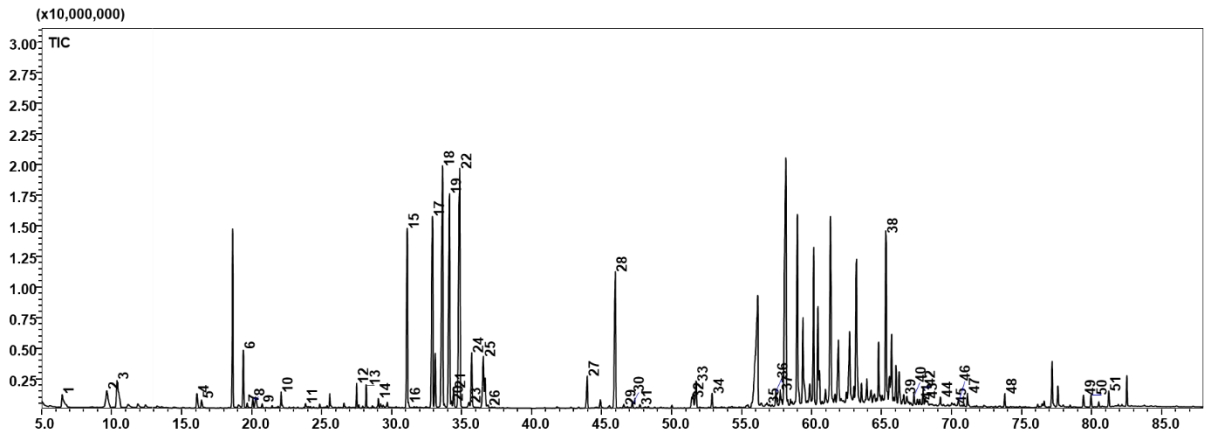

Figure 1. GC-MS derivatization of *Pavetta Indica* methanol extract.
